# Functional Clustering of Periodic Transcriptional Profiles through ARMA( $p, q$ )

Ning Li<sup>1</sup>, Timothy McMurry<sup>2</sup>, Arthur Berg<sup>3,4</sup>, Zhong Wang<sup>3</sup>, Scott A. Berceci<sup>5</sup>, Rongling Wu<sup>3,4\*</sup>

**1** Department of Epidemiology and Biostatistics, University of Florida, Gainesville, Florida, United States of America, **2** Department of Mathematical Sciences, DePaul University, Chicago, Illinois, United States of America, **3** Division of Biostatistics, Pennsylvania State University College of Medicine, Hershey, Pennsylvania, United States of America, **4** Center for Computational Biology, Beijing Forestry University, Beijing, People's Republic of China, **5** Department of Surgery, University of Florida, Gainesville, Florida, United States of America

## Abstract

**Background:** Gene clustering of periodic transcriptional profiles provides an opportunity to shed light on a variety of biological processes, but this technique relies critically upon the robust modeling of longitudinal covariance structure over time.

**Methodology:** We propose a statistical method for functional clustering of periodic gene expression by modeling the covariance matrix of serial measurements through a general autoregressive moving-average process of order ( $p, q$ ), the so-called ARMA( $p, q$ ). We derive a sophisticated EM algorithm to estimate the proportions of each gene cluster, the Fourier series parameters that define gene-specific differences in periodic expression trajectories, and the ARMA parameters that model the covariance structure within a mixture model framework. The orders  $p$  and  $q$  of the ARMA process that provide the best fit are identified by model selection criteria.

**Conclusions:** Through simulated data we show that whenever it is necessary, employment of sophisticated covariance structures such as ARMA is crucial in order to obtain unbiased estimates of the mean structure parameters and increased precision of estimation. The methods were implemented on recently published time-course gene expression data in yeast and the procedure was shown to effectively identify interesting periodic clusters in the dataset. The new approach will provide a powerful tool for understanding biological functions on a genomic scale.

**Citation:** Li N, McMurry T, Berg A, Wang Z, Berceci SA, et al. (2010) Functional Clustering of Periodic Transcriptional Profiles through ARMA( $p, q$ ). PLoS ONE 5(4): e9894. doi:10.1371/journal.pone.0009894

**Editor:** Magnus Rattray, University of Manchester, United Kingdom

**Received:** November 16, 2009; **Accepted:** February 24, 2010; **Published:** April 16, 2010

**Copyright:** © 2010 Li et al. This is an open-access article distributed under the terms of the Creative Commons Attribution License, which permits unrestricted use, distribution, and reproduction in any medium, provided the original author and source are credited.

**Funding:** This work was supported by National Science Foundation (NSF) grant (00060643) and the Changjiang Scholarship Award at Beijing Forestry University. The funders had no role in study design, data collection and analysis, decision to publish, or preparation of the manuscript.

**Competing Interests:** The authors have declared that no competing interests exist.

\* E-mail: rwu@hes.hmc.psu.edu

## Introduction

DNA microarray technologies are widely used to detect and understand genome-wide gene expression regulation and function. Microarray experiments typically collect expression data on thousands of genes and the high dimensionality of the data impose statistical challenges. The statistical issues become even more pronounced when transitioning from static microarray data to *temporal* microarray experiments where the gene expression levels are traced over a period of time. Examples of temporal microarray experiments include studies of the cell cycles in yeast [1] and the circadian cycles in mice [2]. It is well known that a lot of biological processes are characterized by periodic rhythms as a result of nonlinear cellular regulation, such as the aforementioned circadian rhythms in mice, cell division [3], and complex cell cycles in some organisms [4,5]. The temporal microarray experiments are useful in understanding the periodicity and regulation of behavioral and physiological rhythms in organisms, and through clustering gene expression profiles based on their periodic patterns, it is possible to associate genes with physiological functions of interest. Functional principal component analysis and mixture models have become

popular dimension reduction tools in microarray studies to cluster genes of similar temporal patterns [6–12]. These methods model the time-dependent gene expression profiles based on nonparametric approaches. The proposed model models the expression profiles by a Fourier series which can be considerably more powerful in the presence of truly periodic signals while remaining robust to non-periodic signals. This is illustrated in the real data analysis in the Real Data Application section below.

There has been a long history of using parsimonious mathematical functions, e.g. the Fourier series, to describe periodic biological processes [13,14]. Recent application of the Fourier series approximation lies in the areas of identification of patterns of biological rhythmicity during the neonatal period [15], pharmacodynamics [16] and detection of periodic gene expression in various organisms [1,17–19]. Kim et al. [20] integrated the Fourier series approximation into a mixture model approach to functional clustering of gene expression on the basis of their periodic patterns, which makes it possible to test biologically meaningful characteristics of expression profiles such as the differences in gene expression trajectories, curve features, and the duration of biological rhythms.

Although the approach proposed by Kim et al. [20] efficiently enhances the model power by assuming the first-order autoregressive (AR(1)) covariance structure for the time-dependent gene expression data, such approximation may not always be adequate in real practice. The autoregressive moving-average model, which is usually referred to as ARMA( $p,q$ ), has been commonly used in time series analysis and is viewed as a higher order and thus more flexible class of covariance structures than AR(1) [21–23]. It is generated from an autoregressive (AR) process of order  $p$  and a moving average (MA) process of order  $q$ ; the AR(1) model is a special case of the ARMA( $p,q$ ) model with  $p=1$  and  $q=0$ . In this article, we extend the approach of Kim et al. [20] by using the more flexible ARMA( $p,q$ ) covariance structure for the gene expression profiles.

Unlike AR(1), the ARMA covariance matrix generally does not have closed form solutions for its inverse and determinant, which imposes challenges in parameter estimation and likelihood function evaluation. We use a recursive method [24] and a numerical differentiation approach [25] to evaluate the likelihood function and estimate the covariance parameters in the ARMA( $p,q$ ) model. However, the computational burden and complexity increase dramatically compared to the closed form model of Kim et al. (2008), though on a modern computer these calculations still remain very reasonable.

The rest of the article is organized as follows. The model and the inference procedure are described in Section 2. Section 3 includes simulation studies to investigate the improvement in estimation accuracy and efficiency comparing the ARMA ( $p,q$ ) with AR(1). Discussions and further remarks are provided in the last section.

## Methods

### Mixture Model

We consider a finite mixture model for clustering the gene expression profiles of  $n$  genes. For a detailed discussion of the finite mixture models, a suggested reference is [26]. We assume the genes are measured at equally spaced time points  $t_1, \dots, t_M$ , where  $t_M$  is the longest possible observation time. The individual genes may have fewer than  $M$  measurements, and for simplicity, we assume there is no missing data in between two observed measurements. Let the vector  $\mathbf{y}_i = (y_i(t_1), \dots, y_i(t_{m_i}))$  collect the expression data for gene  $i$  over the  $m_i$  time points, where  $m_i \leq M$ . We assume there are  $J$  expression patterns in the  $n$  genes, which indicates that there are  $J$  components in the mixture model and each gene arises from one and only one of the  $J$  possible components. We further assume that  $\mathbf{y}_i$  is a realization of a mixture of  $J$  multivariate normal distributions with the density function specified as

$$\mathbf{y}_i \sim f_i(\mathbf{y}_i; \boldsymbol{\omega}, \boldsymbol{\mu}_i, \boldsymbol{\Sigma}_i) = \sum_{j=1}^J \omega_j f_{ij}(\mathbf{y}_i; \boldsymbol{\mu}_{ij}, \boldsymbol{\Sigma}_i) \quad (1)$$

where  $\boldsymbol{\omega} = (\omega_1, \dots, \omega_J)$  is a vector of non-negative proportions for the  $J$  patterns that sum to unity and  $f_{ij}(\mathbf{y}_i; \boldsymbol{\mu}_{ij}, \boldsymbol{\Sigma}_i)$  denotes the density function for the  $j$ -th gene expression pattern, a multivariate normal with mean vector  $\boldsymbol{\mu}_{ij} = (\mu_{ij}(t_1), \dots, \mu_{ij}(t_{m_i}))$  and the common  $m_i \times m_i$  covariance matrix  $\boldsymbol{\Sigma}_i$ . Let  $\boldsymbol{\mu}_i = (\boldsymbol{\mu}_{i1}, \dots, \boldsymbol{\mu}_{iJ})$  contain the pattern-specific mean vectors for gene  $i$ .

The Fourier series can be used to approximate time-dependent expression if the genes are periodically regulated (Spellman et al.

1998). It decomposes the periodic expression level into a sum of the orthogonal sinusoidal terms. The general form of the Fourier signal is

$$F(t) = \alpha_0 + \sum_{k=1}^{\infty} \left( \alpha_k \cos\left(\frac{2\pi kt}{\tau}\right) + \beta_k \sin\left(\frac{2\pi kt}{\tau}\right) \right). \quad (2)$$

The coefficients  $\alpha_k$  and  $\beta_k$  determine the times at which the expression level achieves maximums and minimums,  $\alpha_0$  is the average expression level of the gene, and  $\tau$  specifies the periodicity of the regulation. The gene expression value over time can be approximated by partial sum of the Fourier series decomposition where the sum in (2) only contains  $K$  terms. We denote this Fourier series approximation by  $F_K(t)$ ; specifically,

$$F_K(t) = \alpha_0 + \sum_{k=1}^K \left( \alpha_k \cos\left(\frac{2\pi kt}{\tau}\right) + \beta_k \sin\left(\frac{2\pi kt}{\tau}\right) \right).$$

For pattern  $j$ , the mean expression value of gene  $i$  at time  $t_\ell$ ,  $\ell = 1, \dots, m_i$ , is  $\mu_{ij}(t_\ell) = F_K(t_\ell; \boldsymbol{\Theta}_{\mu_j})$ , where  $\boldsymbol{\Theta}_{\mu_j} = \{\alpha_{0j}, \alpha_{1j}, \dots, \alpha_{Kj}, \beta_{1j}, \dots, \beta_{Kj}, \tau_j\}$  denotes the vector of Fourier parameters of the first  $K$  orders. To put the mean structure into the normality framework specified in (1), we assume that for gene  $i$ , if it belongs to pattern  $j$ , the observed data are  $F_K(t_\ell; \boldsymbol{\Theta}_{\mu_j}) + \varepsilon_{ij}(\ell)$  for  $\ell = 1, \dots, m_i$ , where the random errors are components of a multivariate normal distribution; i.e.,

$$\boldsymbol{\varepsilon}_{ij} = (\varepsilon_{ij}(1), \dots, \varepsilon_{ij}(m_i)) \sim N(\mathbf{0}, \boldsymbol{\Sigma}_i).$$

A common and convenient method to model the covariance structure of  $\boldsymbol{\Sigma}_i$  is to use the first-order autoregressive model (AR(1)). Although the AR(1) covariance matrix has computational advantages through having closed form expressions of its inverse and determinant, it lacks flexibility being parameterized by only two parameters (typically denoted by  $\sigma^2$  and  $\rho$ ). In order to accommodate more robust covariance structures, we adopt a flexible approach using the autoregressive moving-average process, ARMA( $p,q$ ) [23]. The zero-mean random error  $\boldsymbol{\varepsilon}_{ij}$  is generated according to the following process

$$\varepsilon_{ij}(t) = \eta_t + \sum_{k=1}^p \varphi_k \varepsilon_{ij}(t-k) + \sum_{k=1}^q \theta_k \eta_{t-k}$$

where  $\varphi_1, \dots, \varphi_p$  and  $\theta_1, \dots, \theta_q$  are unknown parameters, and  $\{\eta_t\}$  is a sequence of independent and identically distributed (iid) normal random variables with zero mean and variance  $\sigma^2$ . Certain restrictions are imposed on the parameters of the ARMA model to insure estimability; further details can be found in [24] and [27]. The ARMA( $p,q$ ) model parameters are listed in  $\boldsymbol{\Theta}_v = \{\varphi_1, \dots, \varphi_p, \theta_1, \dots, \theta_q, \sigma^2\}$ .

The total number of parameters to be estimated with  $J$  clusters, an ARMA( $p,q$ ) covariance structure, and a Fourier series of degree  $K$  comes to  $p + q + 1 + 2J(K + 1)$ .

### Likelihood and Algorithm

Denote the entire set of unknown parameters as  $\boldsymbol{\Theta} = (\omega_1, \dots, \omega_J, \boldsymbol{\Theta}_{\mu_1}, \dots, \boldsymbol{\Theta}_{\mu_J}, \boldsymbol{\Theta}_v)$  denote the set of unknown parameters in the mixture model. In the absence of knowledge

**Table 1.** Simulated averages and standard errors of parameter estimates using the ARMA(2,2) model when the true covariance structure is ARMA(2,2) (No. simulations = 200).

|                             | Pattern                |                        |                        |
|-----------------------------|------------------------|------------------------|------------------------|
|                             | 1                      | 2                      | 3                      |
| <b>Proportion</b>           |                        |                        |                        |
| $\omega/\hat{\omega}$       | 0.300/0.301(0.022)     | 0.500/0.497(0.027)     | 0.200/0.202(0.022)     |
| <b>Mean vector</b>          |                        |                        |                        |
| $a_0/\hat{a}_0$             | 2.000/1.999(0.234)     | 2.050/2.032(0.183)     | 2.100/2.121(0.312)     |
| $a_1/\hat{a}_1$             | 0.500/0.495(0.074)     | -0.400/-0.393(0.060)   | 0.600/0.606(0.115)     |
| $b_1/\hat{b}_1$             | -0.800/-0.803(0.062)   | 0.700/0.697(0.063)     | -0.700/-0.713(0.105)   |
| $a_2/\hat{a}_2$             | -0.500/-0.497(0.035)   | -0.600/-0.601(0.031)   | -0.500/-0.501(0.054)   |
| $b_2/\hat{b}_2$             | 1.000/1.004(0.025)     | 1.100/1.099(0.026)     | 1.000/1.000(0.040)     |
| $T/\hat{T}$                 | 120.000/120.020(0.190) | 135.000/134.992(0.197) | 140.000/140.037(0.426) |
| <b>Covariance</b>           |                        |                        |                        |
| $\varphi_1/\hat{\varphi}_1$ |                        | 1.300/1.300(0.016)     |                        |
| $\varphi_2/\hat{\varphi}_2$ |                        | -0.400/-0.401(0.015)   |                        |
| $\theta_1/\hat{\theta}_1$   |                        | 0.700/0.700(0.017)     |                        |
| $\theta_2/\hat{\theta}_2$   |                        | 0.120/0.118(0.011)     |                        |
| $\sigma^2/\hat{\sigma}^2$   |                        | 0.700/0.698(0.010)     |                        |

doi:10.1371/journal.pone.0009894.t001

on the membership of the expression pattern for the genes, the likelihood function based on the mixture model (1) is

$$L(\Theta|\mathbf{y}) = \prod_{i=1}^n \left[ \sum_{j=1}^J \omega_j f_{ij}(\mathbf{y}_i; \boldsymbol{\mu}_{ij}, \boldsymbol{\Sigma}_i) \right].$$

The log-likelihood function is non-linear in  $\Theta$  which imposes difficulty in estimating the unknown parameters. Here we use the EM algorithm to obtain the maximum likelihood estimate of  $\Theta$ . Let  $z_{ij}$  be a latent variable, defined as 1 if gene  $i$  arises from the  $j$ -th pattern, and write  $\mathbf{z}_i = (z_{i1}, \dots, z_{iJ})$ . Then  $\mathbf{z}_1, \dots, \mathbf{z}_n$  are *i.i.d.* multinomial random variables with probabilities  $(\omega_1, \dots, \omega_J)$ . The complete data log-likelihood is

**Table 2.** Simulated averages and standard errors of parameter estimates using the ARMA(2,1) model when the true covariance structure is ARMA(2,2) (No. simulations = 200).

|                             | Pattern                |                        |                        |
|-----------------------------|------------------------|------------------------|------------------------|
|                             | 1                      | 2                      | 3                      |
| <b>Proportion</b>           |                        |                        |                        |
| $\omega/\hat{\omega}$       | 0.300/0.301(0.022)     | 0.500/0.496(0.028)     | 0.200/0.202(0.022)     |
| <b>Mean vector</b>          |                        |                        |                        |
| $a_0/\hat{a}_0$             | 2.000/1.995(0.234)     | 2.050/2.031(0.175)     | 2.100/2.112(0.317)     |
| $a_1/\hat{a}_1$             | 0.500/0.496(0.072)     | -0.400/-0.394(0.060)   | 0.600/0.600(0.109)     |
| $b_1/\hat{b}_1$             | -0.800/-0.804(0.060)   | 0.700/0.696(0.064)     | -0.700/-0.711(0.107)   |
| $a_2/\hat{a}_2$             | -0.500/-0.497(0.035)   | -0.600/-0.600(0.031)   | -0.500/-0.501(0.053)   |
| $b_2/\hat{b}_2$             | 1.000/1.004(0.025)     | 1.100/1.099(0.026)     | 1.000/1.002(0.040)     |
| $\tau/\hat{\tau}$           | 120.000/120.020(0.195) | 135.000/134.987(0.194) | 140.000/140.037(0.415) |
| <b>Covariance</b>           |                        |                        |                        |
| $\varphi_1/\hat{\varphi}_1$ |                        | 1.300/1.397(0.007)     |                        |
| $\varphi_2/\hat{\varphi}_2$ |                        | -0.400/-0.488(0.005)   |                        |
| $\theta_1/\hat{\theta}_1$   |                        | 0.700/0.585(0.009)     |                        |
| $\theta_2/\hat{\theta}_2$   |                        | 0.120/-                |                        |
| $\sigma^2/\hat{\sigma}^2$   |                        | 0.700/0.701(0.010)     |                        |

doi:10.1371/journal.pone.0009894.t002

**Table 3.** Simulated averages and standard errors of parameter estimates using the ARMA(1,1) model when the true covariance structure is ARMA(2,2) (No. simulations = 200).

|                             | Pattern                |                        |                        |
|-----------------------------|------------------------|------------------------|------------------------|
|                             | 1                      | 2                      | 3                      |
| <b>Proportion</b>           |                        |                        |                        |
| $\omega/\hat{\omega}$       | 0.300/0.301(0.022)     | 0.500/0.491(0.029)     | 0.200/0.207(0.025)     |
| <b>Mean vector</b>          |                        |                        |                        |
| $a_0/\hat{a}_0$             | 2.000/1.997(0.244)     | 2.050/2.059(0.185)     | 2.100/2.023(0.311)     |
| $a_1/\hat{a}_1$             | 0.500/0.494(0.073)     | -0.400/-0.430(0.067)   | 0.600/0.664(0.122)     |
| $b_1/\hat{b}_1$             | -0.800/-0.803(0.062)   | 0.700/0.734(0.069)     | -0.700/-0.769(0.104)   |
| $a_2/\hat{a}_2$             | -0.500/-0.498(0.036)   | -0.600/-0.595(0.032)   | -0.500/-0.491(0.053)   |
| $b_2/\hat{b}_2$             | 1.000/1.004(0.025)     | 1.100/1.098(0.027)     | 1.000/0.997(0.040)     |
| $T/\hat{T}$                 | 120.000/120.018(0.196) | 135.000/135.067(0.196) | 140.000/139.808(0.482) |
| <b>Covariance</b>           |                        |                        |                        |
| $\varphi_1/\hat{\varphi}_1$ |                        | 1.300/0.927(0.002)     |                        |
| $\varphi_2/\hat{\varphi}_2$ |                        | -0.400/-               |                        |
| $\theta_1/\hat{\theta}_1$   |                        | 0.700/0.803(0.006)     |                        |
| $\theta_2/\hat{\theta}_2$   |                        | 0.120/-                |                        |
| $\sigma^2/\hat{\sigma}^2$   |                        | 0.700/0.839(0.014)     |                        |

doi:10.1371/journal.pone.0009894.t003

thus

$$\log L_c(\Theta|\mathbf{y}) = \sum_{i=1}^n \sum_{j=1}^J z_{ij} \log \left[ \omega_j f_{ij}(\mathbf{y}_i; \boldsymbol{\mu}_{ij}, \boldsymbol{\Sigma}_i) \right]. \quad (3)$$

In the E-step of the algorithm, the posterior expectation of  $z_{ij}$ , i.e.,

the posterior probability that gene  $i$  arises from the  $j$ -th pattern, is evaluated given the current estimate of  $\Theta$  and the data. In the M-step,  $\Theta$  is updated from the expectation of complete data log-likelihood in which  $z_{ij}$  is replaced by its posterior expectation from the E-step. The algorithm proceeds by iterating between the two steps until convergence. The details of the EM algorithm are given in the Supporting Information (Text S1).

**Table 4.** Simulated averages and standard errors of parameter estimates using the ARMA(1,0) model when the true covariance structure is ARMA(2,2) (No. simulations = 200).

|                             | Pattern                |                        |                        |
|-----------------------------|------------------------|------------------------|------------------------|
|                             | 1                      | 2                      | 3                      |
| <b>Proportion</b>           |                        |                        |                        |
| $\omega/\hat{\omega}$       | 0.300/0.301(0.022)     | 0.500/0.443(0.092)     | 0.200/0.256(0.091)     |
| <b>Mean vector</b>          |                        |                        |                        |
| $a_0/\hat{a}_0$             | 2.000/2.014(0.247)     | 2.050/2.112(0.191)     | 2.100/1.925(0.283)     |
| $a_1/\hat{a}_1$             | 0.500/0.484(0.097)     | -0.400/-0.333(0.414)   | 0.600/0.547(0.406)     |
| $b_1/\hat{b}_1$             | -0.800/-0.796(0.112)   | 0.700/0.591(0.521)     | -0.700/-0.564(0.514)   |
| $a_2/\hat{a}_2$             | -0.500/-0.494(0.073)   | -0.600/-0.572(0.056)   | -0.500/-0.494(0.069)   |
| $b_2/\hat{b}_2$             | 1.000/0.991(0.088)     | 1.100/1.088(0.052)     | 1.000/1.006(0.055)     |
| $T/\hat{T}$                 | 120.000/119.838(5.409) | 135.000/135.718(1.487) | 140.000/138.907(1.552) |
| <b>Covariance</b>           |                        |                        |                        |
| $\varphi_1/\hat{\varphi}_1$ |                        | 1.300/0.952(0.002)     |                        |
| $\varphi_2/\hat{\varphi}_2$ |                        | -0.400/-               |                        |
| $\theta_1/\hat{\theta}_1$   |                        | 0.700/-                |                        |
| $\theta_2/\hat{\theta}_2$   |                        | 0.120/-                |                        |
| $\sigma^2/\hat{\sigma}^2$   |                        | 0.700/1.732(0.057)     |                        |

doi:10.1371/journal.pone.0009894.t004

**Table 5.** Simulated averages and standard errors of parameter estimates using the ARMA(2,2) model when the true covariance structure is ARMA(1,0) (No. simulations = 200).

|                             | Pattern                |                        |                         |
|-----------------------------|------------------------|------------------------|-------------------------|
|                             | 1                      | 2                      | 3                       |
| <b>Proportion</b>           |                        |                        |                         |
| $\omega/\hat{\omega}$       | 0.300/0.294(0.060)     | 0.500/0.490(0.098)     | 0.200/0.216(0.111)      |
| <b>Mean vector</b>          |                        |                        |                         |
| $a_0/\hat{a}_0$             | 0.500/0.515(0.123)     | 0.400/0.390(0.088)     | 0.600/0.600(0.304)      |
| $a_1/\hat{a}_1$             | -0.500/0.503(0.082)    | 0.300/0.311(0.056)     | 0.200/0.189(0.168)      |
| $b_1/\hat{b}_1$             | 0.400/0.395(0.094)     | -0.200/-0.202(0.064)   | 0.200/0.201(0.230)      |
| $a_2/\hat{a}_2$             | 0.100/0.095(0.035)     | 0.150/0.148(0.032)     | 0.050/0.063(0.117)      |
| $b_2/\hat{b}_2$             | 0.050/0.052(0.040)     | 0.070/0.071(0.045)     | 0.100/0.086(0.113)      |
| $\tau/\hat{\tau}$           | 120.000/119.953(1.619) | 135.000/134.901(1.658) | 150.000/151.137(12.234) |
| <b>Covariance</b>           |                        |                        |                         |
| $\varphi_1/\hat{\varphi}_1$ |                        | 0.800/0.797(0.008)     |                         |
| $\varphi_2/\hat{\varphi}_2$ |                        | 0/-0.001 (0.001)       |                         |
| $\theta_1/\hat{\theta}_1$   |                        | 0/0.003 (0.013)        |                         |
| $\theta_2/\hat{\theta}_2$   |                        | 0/-0.001 (0.002)       |                         |
| $\sigma^2/\hat{\sigma}^2$   |                        | 1.000/0.996(0.016)     |                         |

doi:10.1371/journal.pone.0009894.t005

**Model Selection**

Our mixture model assumes that the number of components in the mixture model ( $J$ ) and the order of  $p$  and  $q$  in the ARMA covariance structure in  $\Sigma_i$  are known before estimation of the parameters. In practice, however, the model that provides the best fit to the data in terms of  $J$ ,  $p$ , and  $q$  can be identified using the Akaike information criterion (AIC) [28] and the Bayesian information criterion (BIC) [29], which are defined as follows:

$$AIC(J,p,q) = -2 \log L_c(\hat{\Theta}_{(J,p,q)}|\mathbf{y}) + 2N(J,p,q)$$

$$BIC(J,p,q) = -2 \log L_c(\hat{\Theta}_{(J,p,q)}|\mathbf{y}) + \log(n)N(J,p,q)$$

where  $\hat{\Theta}_{(J,p,q)}$  is the maximum likelihood estimate of  $\Theta$  and it is indexed by  $J$  and  $(p,q)$ , and  $N(J,p,q)$  is the number of parameters in the mixture model determined by  $J$  and  $(p,q)$ . The selected model has the smallest AIC and BIC.

Under the framework of maximum likelihood estimation, it is possible that the likelihood increases when more parameters are added into the model, which could lead to overfitting. Both AIC

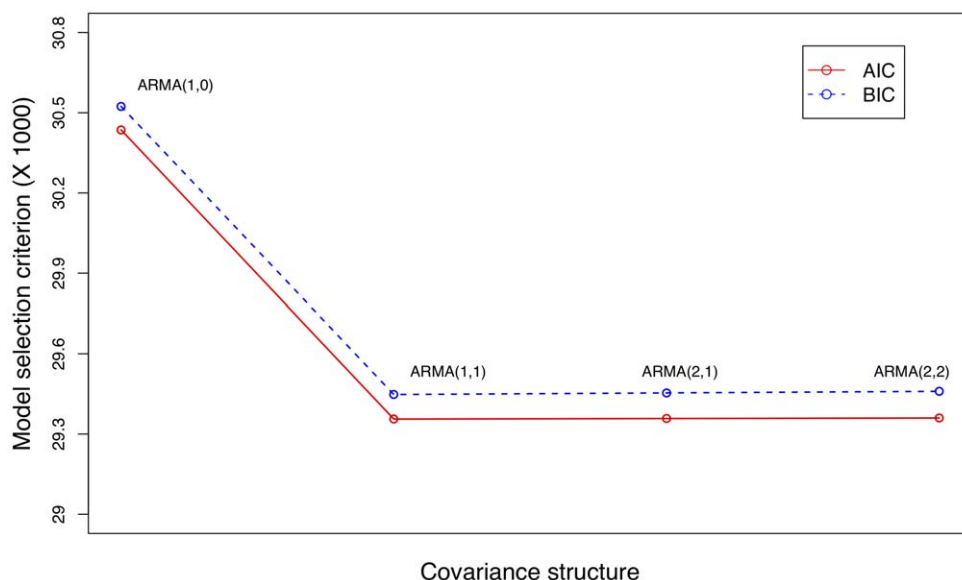

**Figure 1.** In the first simulation study, AIC and BIC values calculated using a simulated dataset whose true covariance structure is ARMA (1,1) to identify the optimal covariance structure to be used.

doi:10.1371/journal.pone.0009894.g001

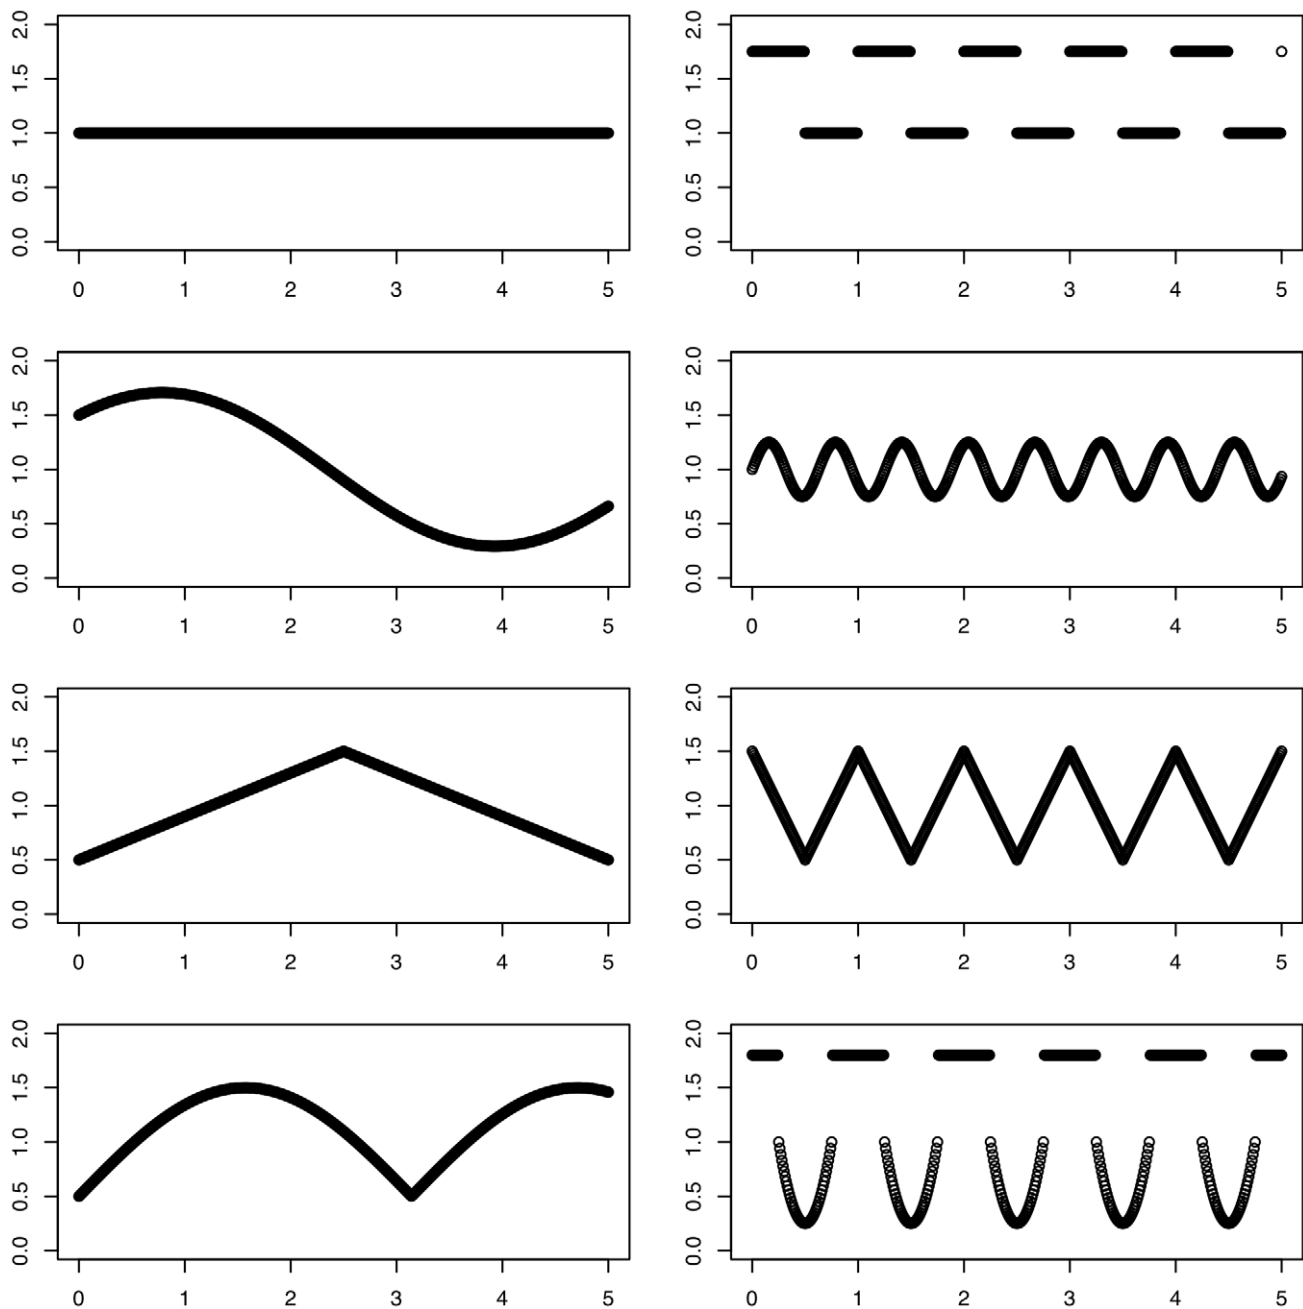

**Figure 2. Simulations were performed using time-course expression data with 40 time points and 100 genes per cluster simulated from eight mean curves graphed here.**  
doi:10.1371/journal.pone.0009894.g002

and BIC resolve this problem by including a penalty term for the number of parameters, but BIC imposes a stronger penalty than AIC, and as a result, it tends to select models with smaller number of parameters than those chosen by AIC method.

The dimension of our model parameters can be viewed as growing in two directions, one determined by  $J$  and the other by  $(p, q)$ . A one unit increase in  $J$  gives rise to addition of  $2K + 2$  parameters, which is always larger than a one unit increase in  $p + q$ , we propose a three-step procedure to select the best model. First, we fit an ARMA covariance structure with relatively low orders  $(p, q)$  to  $\Sigma_i$ , i.e., ARMA(1,0) or ARMA(1,1), and calculate AIC or BIC values by varying  $J$  starting from 1. The model with the smallest AIC or BIC is identified. We denote the corresponding  $J$  as  $J_s$ . We

then fit the mixture model with  $J_s$  components, but this time vary  $(p, q)$  to find the best combination  $(p_s, q_s)$ . In the third step, we go back to step 1 and refit the model with ARMA( $p_s, q_s$ ) and select  $J$  again. The resulting model with the smallest AIC or BIC is our final choice. Alternative to the three-step procedure, if the amount of computation is not a limiting factor, one could simply calculate the AIC or BIC values for all models under consideration and select the model that minimizes the criterion of choice.

### Hypothesis Tests

The existence of at least two different transcriptional expression profile patterns over the  $n$  genes under study can be tested by

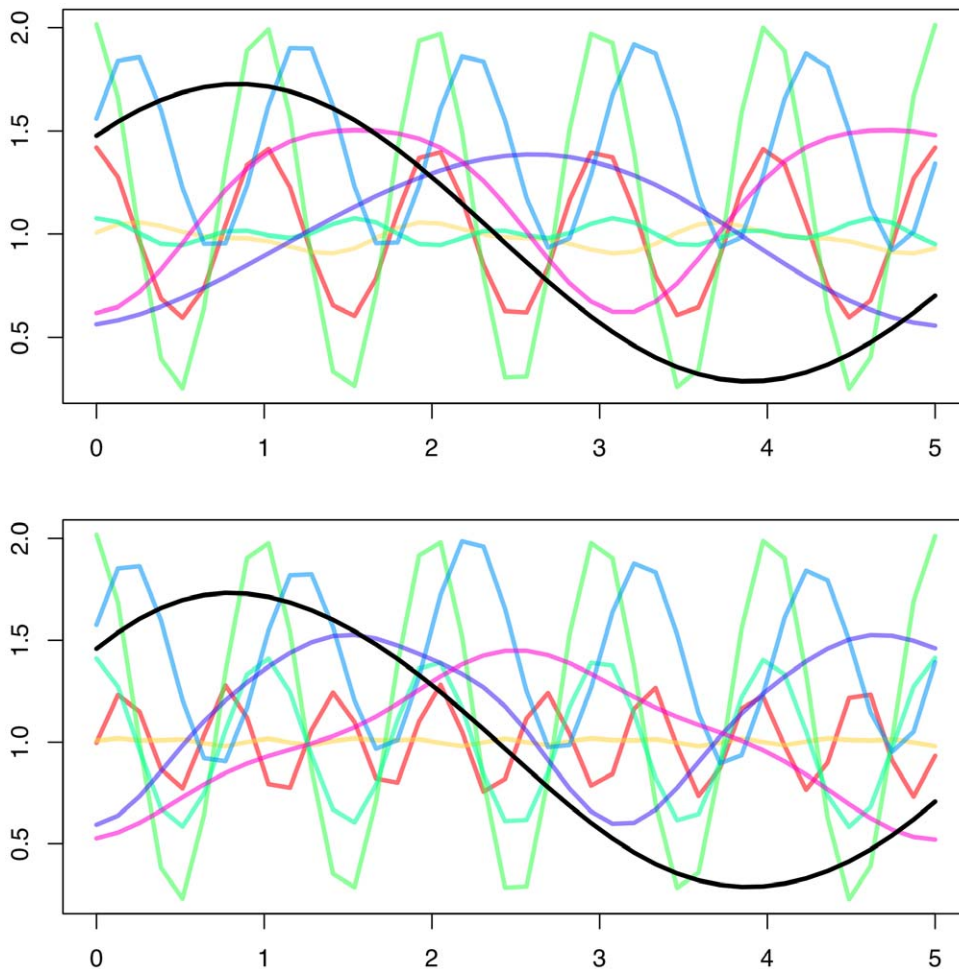

**Figure 3. Estimated mean curves estimated from the simulated data with parameters  $K=2$  (top) and  $K=3$  (bottom).**  
doi:10.1371/journal.pone.0009894.g003

formulating the following hypothesis:

$$\begin{aligned}
 H_0 &: \Theta_{\mu_j} \equiv \Theta_{\mu}, j = 1, \dots, J \\
 H_1 &: \text{At least one of the equalities above does not hold}
 \end{aligned}
 \tag{4}$$

where  $\Theta_{\mu}$  is the vector of the Fourier series parameters when gene expression pattern-specific differences do not exist for the given data. The likelihood ratio test statistic can be calculated under the null and alternative hypotheses; that is,

$$L_r = -2 \left[ \log L(\hat{\Theta}_{H_0} | \mathbf{y}) - \log L(\hat{\Theta} | \mathbf{y}) \right]$$

where  $\hat{\Theta}_{H_0}$  and  $\hat{\Theta}$  stand for the MLEs of the parameters under the null hypothesis and the alternative, respectively.

Since there is no closed-form distribution for  $L_r$ , the critical value for claiming the existence of at least two different expression patterns is determined by a parametric bootstrap method. We simulate  $n$  gene expression profiles at the observed time points under the multivariate normal model indicated by the null hypothesis. The true values of the parameters in the simulation are taken to be the MLE's under the null hypothesis, i.e.,  $\hat{\Theta}_{H_0}$ . For each simulated dataset, the likelihood ratio test statistic  $L_r$  is calculated by fitting the models under the null and the alternative

hypotheses. This procedure is repeated for a large number of times, say 1000, and the 95th percentile of the empirical distribution of  $L_r$  is then regarded as the critical value of the test (4).

## Results

### Simulation Results

The performance of the proposed mixture model in terms of the precision and efficiency of the parameter estimates and the model selection for the number of components have been extensively studied in [20], where the AR(1) covariance structure was considered for  $\Sigma_i$ . Kim et al. show that the mixture model and the EM algorithm can provide reasonably precise estimates of all parameters and AIC and BIC are able to select the right number of components  $J$  in the model. The model was also compared with the random-effect mixture model proposed by [11] and biased parameter estimates were observed for Ng et al.'s method when the gene-expression profiles follow Fourier series approximations.

In this article, we focus on the influence of the assumed covariance structure on the estimation of the proportion parameter  $\omega$  and the mean structure parameters  $\Theta_{\mu_j}$ ,  $j = 1, \dots, J$ . We generated 400 genes from three distinct expression patterns, and the expression of each gene was measured at 25 equally spaced time points. The mean of expression values was

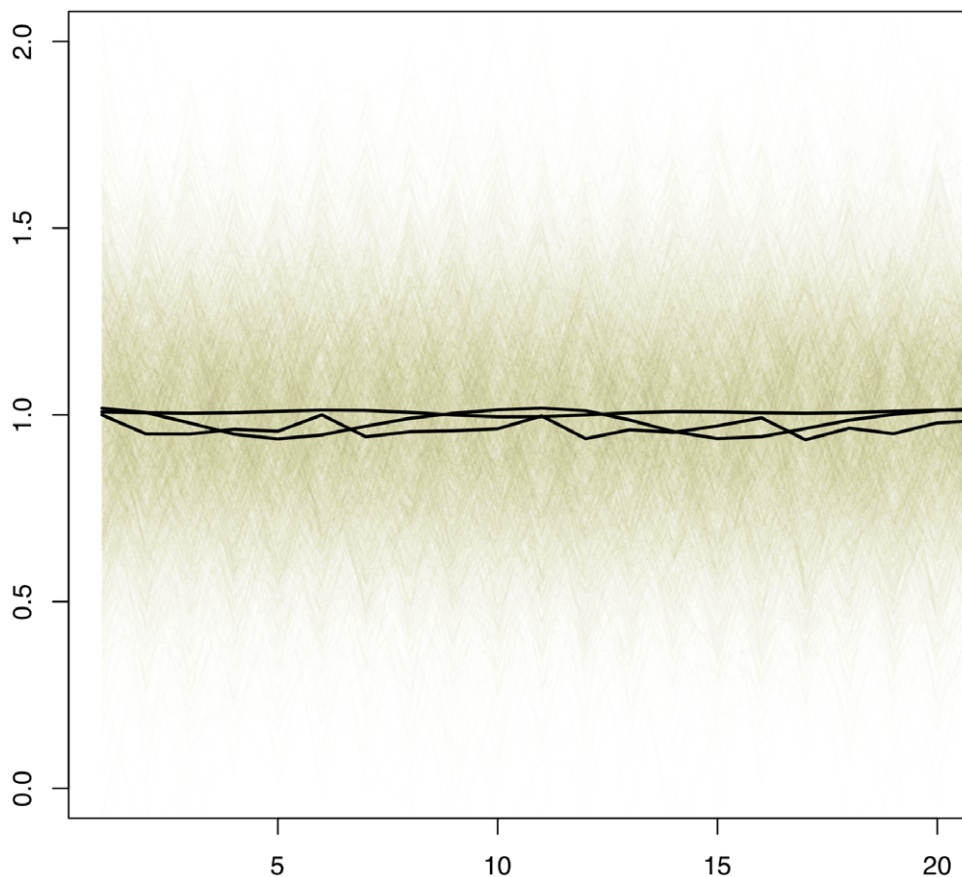

**Figure 4. Functional clustering was applied to stationary noise following an AR(2) covariance structure.** AIC and BIC selected three mean curves and the illustrated mean profiles are small compared with the variation of the data as drawn in the background.  
doi:10.1371/journal.pone.0009894.g004

simulated from a second-order Fourier series. In the first set of simulations, the true covariance structure for the time-dependent expression was ARMA(2,2), but the data were analyzed using ARMA(2,2), ARMA(2,1), ARMA(1,1) and ARMA(1,0), as shown in Tables 1, 2, 3, and 4, respectively. When the assumed covariance structure is the correct one (Table 1), the approach produces relatively accurate estimates for all parameters, but less sophisticated covariance structures could lead to large bias and loss of efficiency in estimation of  $\omega$  and  $\Theta_{\mu_j}, j = 1, \dots, J$

(Tables 2, 3 and 4). We further simulated gene expression profiles under the covariance structure ARMA(1,0), and obtained sound parameter estimates when the data were analyzed using ARMA(2,2) (Table 5). And finally, using a simulated dataset with the true covariance ARMA(1,1), we show that the order  $p$  and  $q$  in the ARMA covariance structure can be correctly determined by AIC and BIC values (Figure 1).

Further simulations were performed to investigate the effects of  $K$  on the estimation. Indeed there is a balance between choosing a sufficiently large  $K$  so as to accurately the model periodic mean curve without selecting too large of a  $K$  where the model would be overfit. Indeed, as described above, the AIC and BIC can assist in selecting the order  $K$ , but together with selecting  $p, q,$  and  $J$ , computations can be somewhat burdensome. In practice,  $K = 2$  or 3 should nicely model fairly intricate periodic expressions. To further test the effectiveness of the methods, we performed a second set of simulations and compared the results of using  $K = 2$  with  $K = 3$  and measured their performance with the adjusted Rand index.

Eight time-course expression profiles were simulated with the mean expression profiles graphed in Figure 2. In total, 800 genes consisting of 100 genes per cluster were simulated with 40 equally spaced time points. Stationary noise generated from an AR(2) model and standard deviation approximately equal to .3 was added to the simulated data. Function clustering with AR(2) covariance structure was performed, and the resulting estimated mean curves were graphed in Figure 3 with  $K = 2$  (top graph) and  $K = 3$  (bottom graph). From the mean curves, we see that seven of

**Table 6. Effects of classification threshold on cluster sizes for the three cluster estimation on simulated noise.**

| threshold | #1   | #2   | #3   |
|-----------|------|------|------|
| .95       | 0    | 0    | 0    |
| .90       | 0    | 0    | 125  |
| .80       | 0    | 0    | 1804 |
| .70       | 0    | 0    | 2774 |
| .60       | 0    | 0    | 2952 |
| .50       | 0    | 0    | 2952 |
| ...       | ...  | ...  | ...  |
| .20       | 130  | 21   | 2955 |
| .10       | 1168 | 1065 | 2955 |

doi:10.1371/journal.pone.0009894.t006



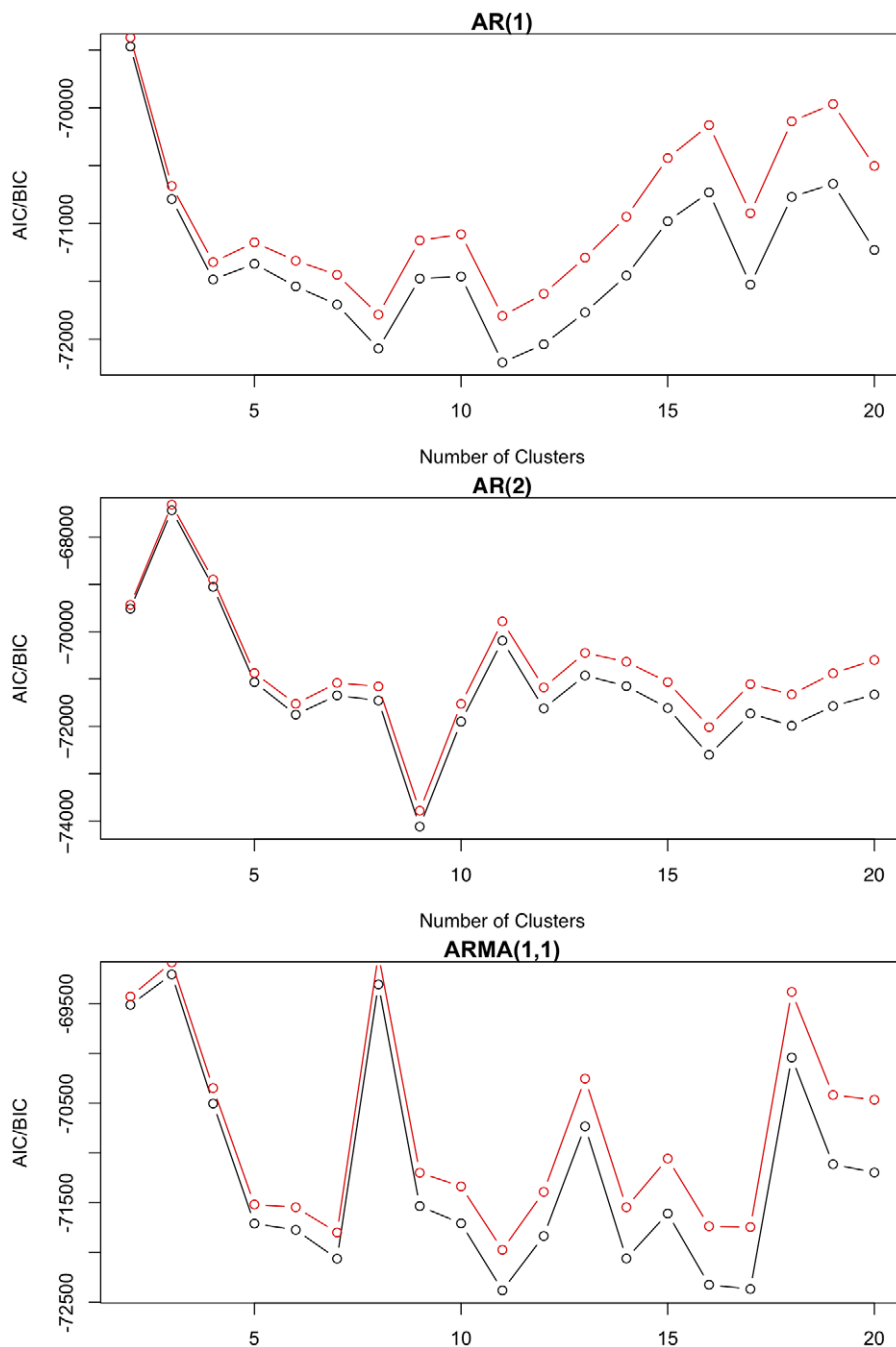

**Figure 5. In real data application, AIC and BIC values for different ARMA structures are calculated over varying number of cluster sizes ( $J$ ). The ARMA model with smallest AIC/BIC turned out to be the AR(2) model.**  
doi:10.1371/journal.pone.0009894.g005

the eight clusters were correctly identified, and with  $K=3$ , all eight mean curves were correctly identified. The simulation performance is further quantified by the adjusted Rand Index as implemented in *mclust* R package [30]. For estimation with  $K=2$ , the adjusted Rand index is .825 (the larger the better), and it is .964 for estimation with  $K=3$ .

Another set of simulations were performed to identify the types of clusters that would be estimated on data generated without any signals, that is, data generated from pure noise. Stationary noise following an AR(2) process was simulated and the model was used to identify periodic clusters. Here, the AIC and BIC selected three

clusters, but the mean functions for the three clusters are all nearly zero compared to the standard deviation of the noise (approximately .3). This is illustrated in Figure 4 where all gene expression profiles are drawn in the background and mean curves, assuming three clusters, are graphed in black. The small amplitudes of the mean curves suggest the three clusters are in fact simply clustering the noise. The weak clustering is further illustrated in Table 6, by varying thresholds between 10% and 99% to investigate its effect on the resulting cluster sizes. Two clusters had very weak clustering and the third cluster essentially clustered the entire dataset.

**Table 7.** Minimum AIC and BIC values, as well as the corresponding optimal number of clusters, over varying number of clusters for the ARMA(1,0), ARMA(1,1), and ARMA(2,0) covariance structures.

| Covariance Structure | AIC              | BIC              | # of clusters |
|----------------------|------------------|------------------|---------------|
| ARMA(1,0)            | -72200.16        | -71798.74        | 11            |
| ARMA(1,1)            | -72379.89        | -71972.49        | 11            |
| ARMA(2,0)            | <b>-74119.34</b> | <b>-73783.83</b> | 9             |

doi:10.1371/journal.pone.0009894.t007

## Real Data Application

This methodology is applied to time time course gene expression data published in [31]. For their research, a total of 8 time-course experiments were performed with expression data collected at 18 to 22 times on 15-minute intervals. We analyzed data from one time-course experiment where the original and processed data is accessible from ArrayExpress with accession number E-MEXP-54. Approximately 3000 genes over 21 time measurements were considered for application of our methods.

To keep the model relatively parsimonious, a single covariance structure was used to model the collection of genes, i.e.  $\Sigma_i \equiv \Sigma$ , and with the following models: ARMA(1,0), ARMA(2,0), and ARMA(1,1). Additionally, allowing for a robust periodic fit but with keeping number of parameters reduced, Fourier series of order two was fit to all of the clusters. The initial values of the parameters in the EM algorithm were randomly selected from reasonable ranges as suggested by the expression profiles. A so-called absorption cluster was also included to soak up the less informative genes with no signal in their time-course profiles; this cluster was initiated in the EM algorithm with zero amplitude. The AIC and BIC values for varying number of clusters across the three covariance structures are graphed in Figure 5. The minimum AIC and BIC values under each covariance structure with corresponding number of clusters are reported in Table 7. The overall smallest AIC and BIC was obtained with the ARMA(2,0), or just simply AR(2), covariance structure identifying 9 distinct clusters that includes the absorption cluster. The estimated ARMA parameters are  $\hat{\phi}_1 = .5154$ ,  $\hat{\phi}_2 = .0805$ , and  $\hat{\sigma}^2 = .0224$ .

Genes are classified to the cluster if they have an estimated probability of 90% or greater of belonging to the cluster. The mean functions for the identified nine distinct clusters are depicted in Figure 6 together with expression profiles of the genes that are classified to the cluster. In this figure, we see the clustering approach is very effective at identifying tightly coupled clusters, even when genes within the cluster don't elegantly follow a periodic structure as seen in clusters 3 and 8. The threshold of 90% is somewhat arbitrarily chosen, and we consider varying thresholds between 10% and 99% to investigate its effect on the resulting cluster sizes. The results are tabulated in Table 8. Clusters 3, 4, 5, 6, 8 remain fairly stable in that they only consist of strongly classified genes, whereas the other clusters have a mix of strongly classified genes and weakly classified genes. Under the 90% threshold, the absorption cluster (the cluster with small variation in expression) soaked up approximately 72% of the genes (2142 genes), and 17% of the genes (501 genes) did not have a dominating cluster defined by the 90% or greater estimated probability threshold. Many genes and their periodic expressions were shown to be effectively clustered by this model.

The analysis of the real data set did suggest some interesting clusters, and we performed a gene ontology (GO) analysis on the tight clusters (clusters 3, 4, 5, 6, and 8) along with clusters 1 and 2. Basic GO organization consisting of three major categories – “biological process”, “cellular component”, and “molecular function” – is considered in addition to a more specific GO classification. Figure 7 depicts the seven clusters, together with all clusters combined, as pie charts broken down by basic GO organization. To identify significant and highly present GO categories, the most prevalent GO within each cluster was measured for overrepresentation by a standard hypergeometric test. Just below each pie chart title, the most prevalent GO category is listed along with the number of times it appears in the network (labeled as count) and the estimated  $p$ -value that is yielded from the hypergeometric test.

The most striking result is seen in cluster 4 where each of the ten genes in the network is categorized with GO:0003677, which represents “DNA binding” under the molecular function ontology. Other significant GO categories in cluster 4 include GO:0005634 (count = 9,  $p = .0021$ , “nucleus”, cellular component) and GO:0006334 (count = 8,  $p = 3.49e-08$ , “nucleosome assembly”, biological process). The other interesting result is GO:0016021 in cluster 3 (count = 5,  $p = .0142$ , “integral to membrane”, cellular component). The names of the genes in clusters 3 and 4 along with their original aliases are provided in Table 9. No significant GO categories were detected in the other clusters. This may be due to a limited number of genes observed in these clusters.

The simulations and real data analyses were performed on a quad-core i7 920 PC overclocked to 4GHz running the Ubuntu Karmic Koala operating system. The timing of the computations varied from several minutes to several hours. AIC and BIC calculation were the most time consuming and multiple models were estimated to determine the best fitting model. The software used to perform these analyses and create the graphs has been made publicly available with further details provided in the following section.

## R Software Package

A new R package, geneARMA [32] that is available on the Comprehensive R Archive Network (CRAN) and licensed under the general public license GPLv3, implements the methods in this paper. This software package provides tools for simulation, estimation, and graphing of the proposed methods in this paper. The estimation and graphics prepared in the real data application of this manuscript were prepared with the geneARMA package.

## Discussion

The proposed mixture model for functional clustering of gene expression profiles provides a flexible framework for estimating the number of mixing components, the periodic means of each component, and the variance-covariance structures. Our approach is useful in comparing the mean expression profiles across different periodic patterns, making it possible to further address the fundamental issues about the interplay between gene expression and biological rhythms. Compared to the existing statistical approaches for temporal gene expression data, our approach has the advantage of fitting a flexible covariance structure into a routine that incorporates mathematical equations for periodic gene expression profiles thereby making the estimation of the mean expression curve more robust to complex covariance phenomena arising in real practice.

We use the Fourier series to model periodicity of the gene expression profiles such as observed in circadian rhythms and cell

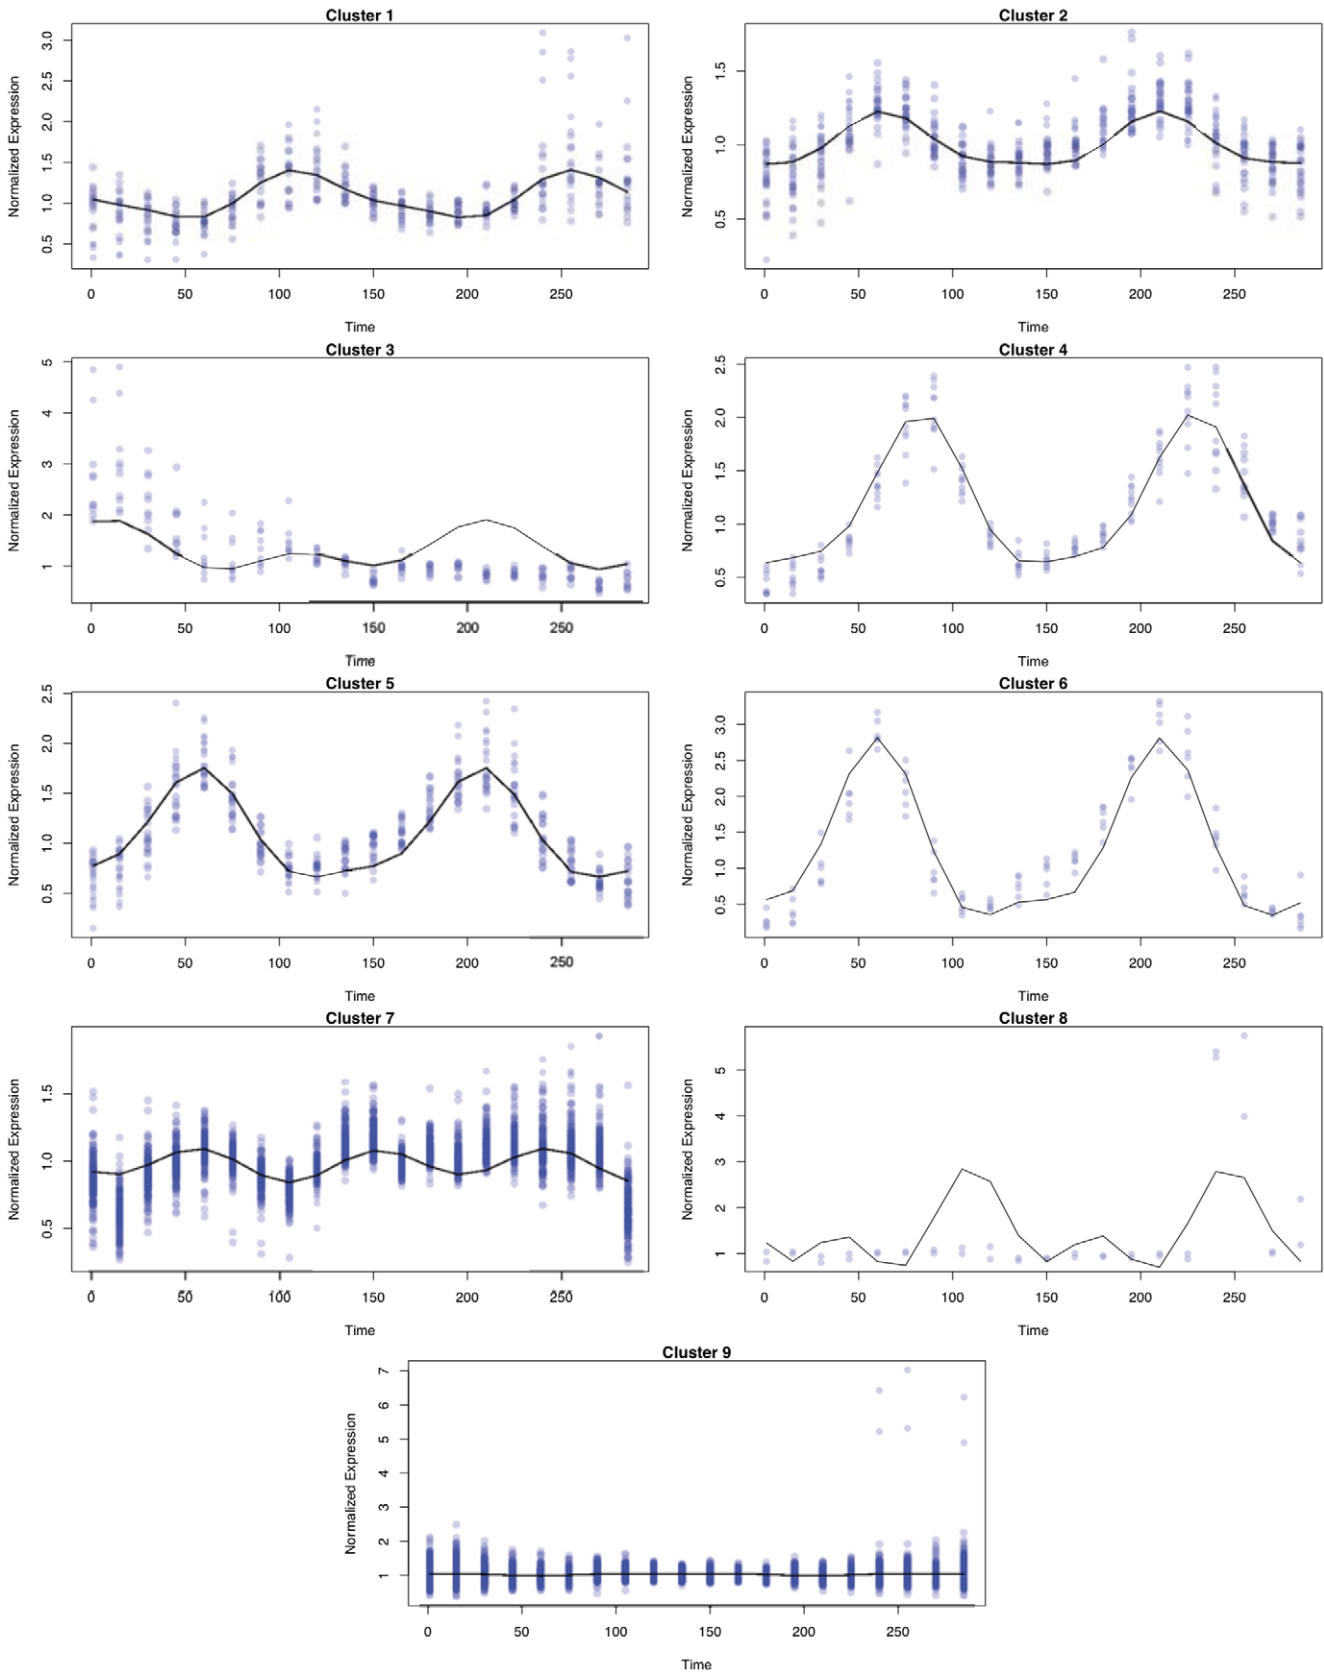

**Figure 6. Mean curves for each of the 9 clusters identified are individually graphed together with time-course gene expression profiles of genes classified to the cluster.** A gene is classified to the cluster if it has greater than a 90% probability of belonging to the cluster. doi:10.1371/journal.pone.0009894.g006

**Table 8.** The effects of classification threshold on cluster sizes.

| threshold | #1  | #2  | #3  | #4  | #5  | #6  | #7  | #8  | #9   |
|-----------|-----|-----|-----|-----|-----|-----|-----|-----|------|
| .99       | 11  | 12  | 9   | 10  | 18  | 6   | 86  | 2   | 1678 |
| .95       | 14  | 20  | 9   | 10  | 19  | 6   | 173 | 2   | 2010 |
| .90       | 19  | 27  | 10  | 10  | 21  | 6   | 217 | 2   | 2142 |
| .80       | 25  | 36  | 10  | 10  | 21  | 6   | 275 | 2   | 2258 |
| .70       | 28  | 41  | 10  | 10  | 22  | 6   | 303 | 2   | 2333 |
| .60       | 30  | 46  | 10  | 10  | 22  | 6   | 357 | 2   | 2384 |
| .50       | 31  | 47  | 10  | 10  | 22  | 6   | 395 | 2   | 2416 |
| ...       | ... | ... | ... | ... | ... | ... | ... | ... | ...  |
| .10       | 40  | 97  | 10  | 10  | 22  | 6   | 668 | 2   | 2600 |

doi:10.1371/journal.pone.0009894.t008

cycles. The coefficients in the Fourier series provide biologically meaningful interpretations and enables testing of several curve features across different clusters. The gene expression  $\times$  time interaction over a period of time can be tested by evaluating the equality of the slopes  $\frac{d}{dt}\mu_j(t)$  of mean expression profiles among the gene groups.

There is always a balance to be made in the complexity of a model given the amount of data under consideration. Short time course expression profiles typically do not have sufficient data display a periodic signal, and one would typically not use a mixture of sinusoidal signals to estimate the mean curves. Alternative approaches for short time series have been proposed such as [9].

The simulation studies discussed in the Section 3 suggest that the proposed procedure is able to produce sound parameter estimates and increased power compared to the AR(1) model when the true intercorrelation structure of the time-dependent expression data is of a higher order. However, the ARMA

covariance structure requires that the gene expression is evaluated at equally spaced times points, which makes it inapplicable when the data are collected irregularly or at gene specific time intervals. Moreover, accurate estimation and classification of gene expression profiles are in need of reasonable approximation of the assumed covariance model to the truth. The simulations also indicate that any parametric methods could be non-robust and produce misleading results when deviation from the true covariance exists. Under these considerations, semi-parametric approaches arise as a promising alternative to the ARMA assumption in the current model [33]. In addition, dimension reduction methods could be integrated into our mixture model to increase the tractability of high dimensional data as the genes are measured over a long time course [34] [35].

Since we usually would not expect periodic expression to exactly follow an ARMA process, the real data analysis was useful to see the effectiveness of the methods in practice. Both the AIC and BIC

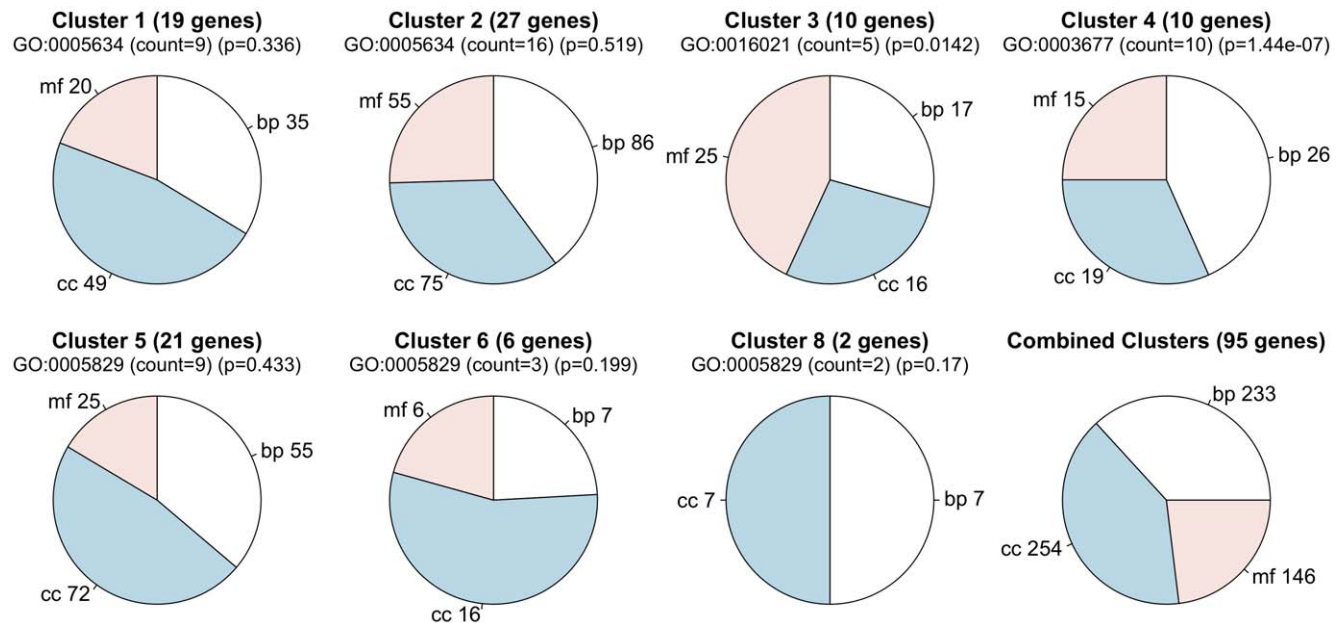

**Figure 7. GO analysis of seven clusters identified in the real data analysis.** Pie charts depict the distribution of biological process ( $^3\text{bp}^2$ ), cellular component ( $^3\text{cc}^2$ ), and molecular function ( $^3\text{mf}^2$ ) in each of the clusters. The most prevalent GO category is indicated below the title with number of times it is present and a p-value computed from a hypergeometric test. The GO listed categories include (GO:0005634, “nucleus”; GO:0016021, “integral to membrane”; GO:0003677, “DNA binding”; GO:0005829, “cytosol”).  
doi:10.1371/journal.pone.0009894.g007

**Table 9.** The names of the genes and their original aliases in clusters 3 and 4.

| Cluster 3     |                 | Cluster 4         |                 |
|---------------|-----------------|-------------------|-----------------|
| Gene name     | Sanger alias    | Gene name         | Sanger alias    |
| hhf1          | R:A-SNGR-8:5476 | hsp16             | R:A-SNGR-8:2957 |
| hhf3          | R:A-SNGR-8:5202 | SPAPB24D3.07C     | R:A-SNGR-8:4962 |
| hht1          | R:A-SNGR-8:5318 | SPBC1347.13C      | R:A-SNGR-8:4371 |
| hht2          | R:A-SNGR-8:5698 | SPBC1348.13       | R:A-SNGR-8:2466 |
| hht3          | R:A-SNGR-8:5012 | SPCC285.05        | R:A-SNGR-8:400  |
| hta1          | R:A-SNGR-8:916  | P07657 (SPMIT.01) | R:A-SNGR-8:4115 |
| hta2          | R:A-SNGR-8:4308 | P05511 (SPMIT.06) | R:A-SNGR-8:4627 |
| htb1          | R:A-SNGR-8:1510 | P21535 (SPMIT.07) | R:A-SNGR-8:5907 |
| sap1          | R:A-SNGR-8:5023 | P21536 (SPMIT.09) | R:A-SNGR-8:3091 |
| SPAC19B12.06c | R:A-SNGR-8:786  | P21537 (SPMIT.10) | R:A-SNGR-8:2067 |

doi:10.1371/journal.pone.0009894.t009

## References

- Spellman P, Sherlock G, Zhang M, Iyer V, Anders K, et al. (1998) Comprehensive identification of cell cycle-regulated genes of the yeast *Saccharomyces cerevisiae* by microarray hybridization. *Molecular biology of the cell* 9: 3273.
- Panda S, Sato T, Castrucci A, Rollag M, DeGrip W, et al. (2002) Melanopsin (Opn4) requirement for normal light-induced circadian phase shifting. *Science* 298: 2213.
- Mitchison J (2003) Growth during the cell cycle. *International review of cytology*. pp 166–258.
- Lakin-Thomas P, Brody S (2004) Circadian rhythms in microorganisms: new complexities.
- Roverly C, La M, Robineau S, Matsumoto K, Renesto P, et al. (2005) Preliminary transcriptional analysis of *spoT* gene family and of membrane proteins in *Rickettsia conorii* and *Rickettsia felis*. *Annals of the New York Academy of Sciences* 1063: 79–82.
- Luan Y, Li H (2003) Clustering of time-course gene expression data using a mixed-effects model with B-splines. *Bioinformatics* 19: 474.
- Luan Y, Li H (2004) Model-based methods for identifying periodically expressed genes based on time course microarray gene expression data. *Bioinformatics* 20: 332.
- Park T, Yi S, Lee S, Lee S, Yoo D, et al. (2003) Statistical tests for identifying differentially expressed genes in time-course microarray experiments. *Bioinformatics* 19: 694.
- Ernst J, Nau G, Bar-Joseph Z (2005) Clustering short time series gene expression data. *Bioinformatics-Oxford* 21: 159.
- Ma P, Castillo-Davis C, Zhong W, Liu J (2006) A data-driven clustering method for time course gene expression data. *Nucleic Acids Research* 34: 1261.
- Ng S, McLachlan G, Wang K, Ben-Tovim Jones L, Ng S (2006) A mixture model with random-effects components for clustering correlated gene-expression profiles. *Bioinformatics* 22: 1745.
- Inoue L, Neira M, Nelson C, Gleave M, Etzioni R (2007) Cluster-based network model for time-course gene expression data. *Biostatistics*.
- Frank O (1926) Die theorie der pulswellen. *Z Biol* 85: 91–130.
- Attinger E, Anne A, McDonald D (1966) Use of Fourier series for the analysis of biological systems. *Biophysical Journal* 6: 291–304.
- ara Begum E, Bonno M, Obata M, Yamamoto H, Kawai M, et al. (2006) Emergence of physiological rhythmicity in term and preterm neonates in a neonatal intensive care unit. *Journal of Circadian Rhythms* 4: 11.
- Mager D, Abernethy D (2007) Use of wavelet and fast Fourier transforms in pharmacodynamics. *Journal of Pharmacology and Experimental Therapeutics* 321: 423.
- Wichert S, Fokianos K, Strimmer K (2004) Identifying periodically expressed transcripts in microarray time series data. *Bioinformatics* 20: 5.
- Kim B, Littell R, Wu R (2006) Clustering periodic patterns of gene expression based on Fourier approximations. *Current Genomics* 7: 197–203.
- Glynn E, Chen J, Mushegian A (2006) Detecting periodic patterns in unevenly spaced gene expression time series using Lomb-Scargle periodograms. *Bioinformatics* 22: 310.
- Kim B, Zhang L, Berg A, Fan J, Wu R (2008) A Computational Approach to the Functional Clustering of Periodic Gene Expression Profiles. *Genetics*.
- Pandit S, Wu S (1983) *Time series and system analysis with applications* Wiley New York.
- McLachlan G, Walden A (1993) *Spectral analysis for physical applications: multitaper and conventional univariate techniques*. Cambridge Univ Pr.
- Box G, Jenkins G, Reinsel G (1976) *Time series analysis: forecasting and control* Holden-day San Francisco.
- Haddad J (2004) On the closed form of the covariance matrix and its inverse of the causal ARMA process. *Journal of Time Series Analysis* 25: 443–448.
- Zeng D, Cai J (2005) Simultaneous modelling of survival and longitudinal data with an application to repeated quality of life measures. *Lifetime Data Analysis* 11: 151–174.
- McLachlan G, Peel D (2000) *Finite mixture models* Wiley-Interscience.
- Brockwell P, Davis R (1991) *Time series: theory and methods* Springer.
- Akaike H (1974) A new look at the statistical model identification. *IEEE transactions on automatic control* 19: 716–723.
- Schwarz G (1978) Estimating the dimension of a model. *The annals of statistics* 6: 461–464.
- Fraley C, Raftery A (2009) *mclust: Model-Based Clustering/Normal Mixture Modeling*. URL <http://CRAN.R-project.org/package=mclust>. R package version 3.4.
- Rustici G, Mata J, Kivinen K, Lió P, Penkett C, et al. (2004) Periodic gene expression program of the fission yeast cell cycle. *Nature genetics* 36: 809–817.
- McMurry T, Berg A (2009) *geneARMA: Simulate, model, and display data from a time-course microarray experiment with periodic gene expression*. URL <http://CRAN.R-project.org/package=geneARMA>. R package version 1.0.
- Fan J, Huang T, Li R (2007) Analysis of longitudinal data with semiparametric estimation of covariance function. *Journal of the American Statistical Association* 102: 632.
- Fan J, Lv J (2008) Sure independence screening for ultra-high dimensional feature space. *Journal of the Royal Statistical Society, Series B*.
- Fan J, Fan Y, Lv J (2008) High dimensional covariance matrix estimation using a factor model. *Journal of Econometrics* 147: 186–197.

selected the AR(2) covariance structure suggesting the flexibility in the ARMA parameters provides a improved fit over the more simplistic AR(1) covariance structure. The graphical views of the model fit impressively demonstrate the utility of the proposed method to real datasets.

## Supporting Information

Details of the EM Algorithm are provided as supporting information (Text S1).

## Supporting Information

**Text S1** Supporting information EM algorithm.

Found at: doi:10.1371/journal.pone.0009894.s001 (0.15 MB PDF)

## Author Contributions

Conceived and designed the experiments: SAB RW. Performed the experiments: NL TM AB. Analyzed the data: NL TM AB ZW. Wrote the paper: NL TM AB RW.
